# Supplementary material for: Transcript Levels of Aldo-Keto Reductase Family 1 Subfamily C (AKR1C) Are Increased in Prostate Tissue of Patients with Type 2 Diabetes
Source: PubMed Central journal article supplement (PMC7564141; doi:10.3390/jpm10030124), 2020-09-12
Supplement: jpm-10-00124-s001.pdf [file jpm-10-00124-s001.pdf]

## Transcript levels of aldo-keto reductase family 1, subfamily C (AKR1C) are increased in prostate tissue of patients with type 2 diabetes

Andras Franko, Lucia Berti, Jörg Hennenlotter, Steffen Rausch, Marcus O. Scharpf, Martin Hrabě de Angelis, Arnulf Stenzl, Andreas L. Birkenfeld, Andreas Peter, Stefan Z. Lutz, Hans-Ulrich Häring, Martin Heni

### Supplementary Materials

**Table S1.** Patient characteristics. Statistical significance was calculated among BEN, noT2D vs BEN, T2D as well as PCa, noT2D vs PCa, T2D samples using Mann-Whitney tests. Statistical significance was considered as  $p < 0.05$ . BMI: body mass index; n: number of patients; BEN: benign prostate tissue; PCa: prostate cancer tissue.

| Parameter                | BEN, noT2D<br>mean $\pm$ SD | BEN, T2D<br>mean $\pm$ SD | BEN<br>p-value | PCa, noT2D<br>mean $\pm$ SD | PCa, T2D<br>mean $\pm$ SD | PCa<br>p-value |
|--------------------------|-----------------------------|---------------------------|----------------|-----------------------------|---------------------------|----------------|
| Age [year]               | 67 $\pm$ 5                  | 63 $\pm$ 6                | 0.0765         | 65 $\pm$ 8                  | 64 $\pm$ 3                | 0.7352         |
| BMI [kg/m <sup>2</sup> ] | 27.6 $\pm$ 3.3              | 29.5 $\pm$ 4.9            | 0.3940         | 26.5 $\pm$ 3.2              | 28.9 $\pm$ 3.8            | 0.1879         |
| Gleason 7a               | -                           | -                         | -              | 7                           | 7                         | -              |
| Gleason 7b               | -                           | -                         | -              | 4                           | 4                         | -              |
| n                        | 17                          | 17                        | -              | 11                          | 11                        | -              |

**Table S2.** Relative gene expression levels were measured in benign (BEN) prostate and prostate cancer (PCa) tissues of patients with (T2D) or without (noT2D) type 2 diabetes. Statistical significance was calculated among BEN, noT2D vs BEN, T2D as well as PCa, noT2D vs PCa, T2D samples using Mann-Whitney tests. Significant differences are shown in bold, non-significant differences are indicated in italic. Statistical significance was considered as  $p < 0.05$ .

| Pathway        | Gene                           | BEN, noT2D<br>mean $\pm$ SD           | BEN, T2D<br>mean $\pm$ SD             | BEN<br>p-value | PCa, noT2D<br>mean $\pm$ SD           | PCa, T2D<br>mean $\pm$ SD             | PCa<br>p-value |
|----------------|--------------------------------|---------------------------------------|---------------------------------------|----------------|---------------------------------------|---------------------------------------|----------------|
| HIF1 $\alpha$  | <i>ANGPTL4</i>                 | <i>0.0152 <math>\pm</math> 0.0164</i> | <i>0.0146 <math>\pm</math> 0.0099</i> | <i>0.4332</i>  | <i>0.0078 <math>\pm</math> 0.0065</i> | <i>0.0100 <math>\pm</math> 0.0101</i> | <i>0.8470</i>  |
|                | <i>GLUT1</i>                   | <i>0.0925 <math>\pm</math> 0.0519</i> | <i>0.0932 <math>\pm</math> 0.0557</i> | <i>1.0000</i>  | <i>0.0842 <math>\pm</math> 0.0327</i> | <i>0.0853 <math>\pm</math> 0.0308</i> | <i>0.9873</i>  |
|                | <b>HIF1<math>\alpha</math></b> | <b>0.6066 <math>\pm</math> 0.2650</b> | <b>0.7629 <math>\pm</math> 0.3382</b> | <b>0.0730</b>  | <b>0.8476 <math>\pm</math> 0.2779</b> | <b>0.8516 <math>\pm</math> 0.5967</b> | <b>0.1713</b>  |
| NF $\kappa$ B  | <i>BIRC5</i>                   | <i>0.0016 <math>\pm</math> 0.0012</i> | <i>0.0013 <math>\pm</math> 0.0010</i> | <i>0.6339</i>  | <i>0.0036 <math>\pm</math> 0.0020</i> | <i>0.0036 <math>\pm</math> 0.0030</i> | <i>0.6994</i>  |
|                | <i>GPX2</i>                    | <i>0.0220 <math>\pm</math> 0.0298</i> | <i>0.0139 <math>\pm</math> 0.0101</i> | <i>0.7273</i>  | <i>0.0091 <math>\pm</math> 0.0110</i> | <i>0.0100 <math>\pm</math> 0.0094</i> | <i>0.5190</i>  |
|                | <i>NOS2</i>                    | <i>0.0014 <math>\pm</math> 0.0015</i> | <i>0.0032 <math>\pm</math> 0.0047</i> | <i>0.1270</i>  | <i>0.0212 <math>\pm</math> 0.0563</i> | <i>0.0014 <math>\pm</math> 0.0014</i> | <i>0.5943</i>  |
|                | <b>RELA</b>                    | <b>0.2805 <math>\pm</math> 0.1127</b> | <b>0.3498 <math>\pm</math> 0.1109</b> | <b>0.0232</b>  | <b>0.3421 <math>\pm</math> 0.1221</b> | <b>0.3573 <math>\pm</math> 0.0509</b> | <b>0.9487</b>  |
|                | <i>SOCS2</i>                   | <i>0.0100 <math>\pm</math> 0.0078</i> | <i>0.0065 <math>\pm</math> 0.0056</i> | <i>0.2415</i>  | <i>0.0069 <math>\pm</math> 0.0083</i> | <i>0.0051 <math>\pm</math> 0.0049</i> | <i>0.8977</i>  |
| proli-feration | <i>MKI67</i>                   | <i>0.0146 <math>\pm</math> 0.0122</i> | <i>0.0099 <math>\pm</math> 0.0066</i> | <i>0.1932</i>  | <i>0.0171 <math>\pm</math> 0.0079</i> | <i>0.0281 <math>\pm</math> 0.0228</i> | <i>0.3653</i>  |
|                | <b>PCNA</b>                    | <b>0.1108 <math>\pm</math> 0.0574</b> | <b>0.0978 <math>\pm</math> 0.0540</b> | <b>0.1932</b>  | <b>0.0939 <math>\pm</math> 0.0255</b> | <b>0.1155 <math>\pm</math> 0.0259</b> | <b>0.0192</b>  |

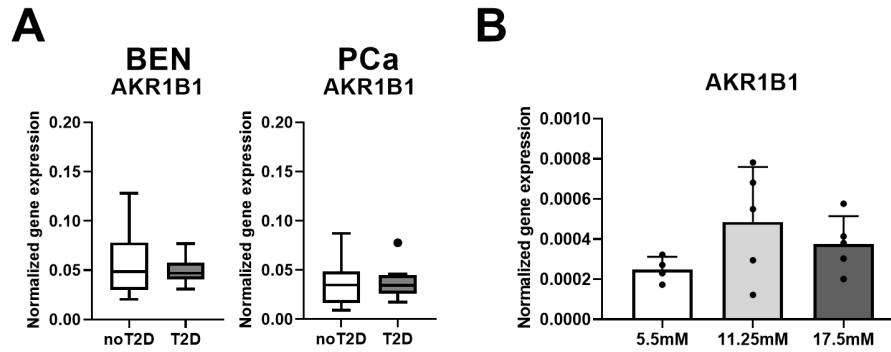

**Figure S1.**

**A** Gene expression of *AKR1B1* was measured in benign (BEN) prostate (n=17-17) and prostate cancer (PCa) (n=11-11) tissues of patients with (T2D) or without (noT2D) type 2 diabetes. Data are shown as Tukey box plots. Statistical significance was calculated among BEN, noT2D vs BEN, T2D as well as PCa, noT2D vs PCa, T2D samples using Mann-Whitney tests. **B** Gene expression of *AKR1B1* was measured in 5.5-, 11.25- and 17.5 mM glucose treated PC3 cells (n=5 independent experiments). Statistical significance was calculated using paired Friedman test with Dunn's multiple comparison. Statistical significance was considered as  $p < 0.05$ .
